# Supplementary material for: Hexanuclear [Ni2Ln4] clusters exhibiting enhanced magnetocaloric effect and slow magnetic relaxation
Source: Royal Society of Chemistry journal article supplement (doi:10.1039/c4ra07882a), 2014-01-01
Supplement: c4ra07882a1.pdf [file c4ra07882a1.pdf]

Supporting Information for

**Hexanuclear  $[\text{Ni}_2\text{Ln}_4]$  clusters exhibiting enhanced magnetocaloric effect and slow magnetic relaxation**

Cai-Ming Liu,\* De-Qing Zhang, and Dao-Ben Zhu

*Beijing National Laboratory for Molecular Sciences, Center for Molecular Science,  
Institute of Chemistry, Chinese Academy of Sciences, Beijing 100190, P.R. China*

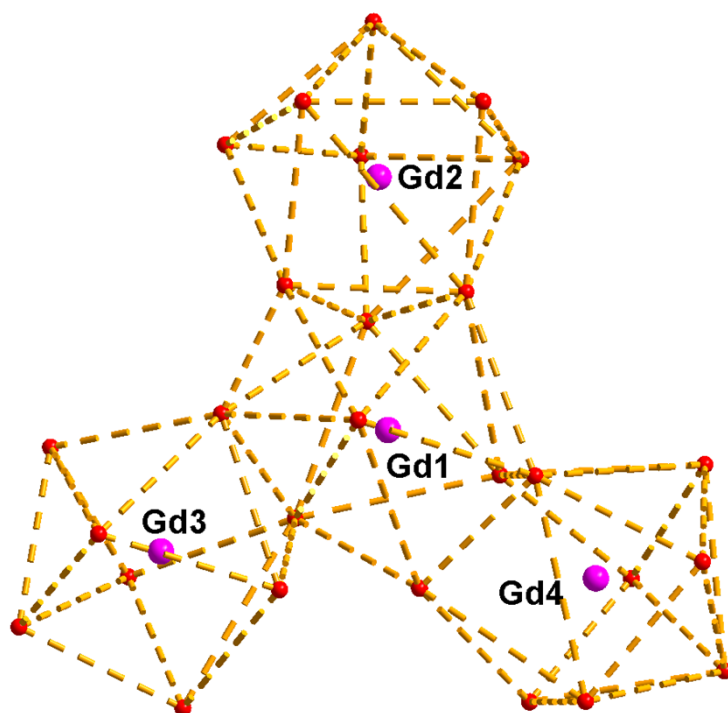

**Fig. S1.** Coordination geometries of the Gd atoms in **1**.

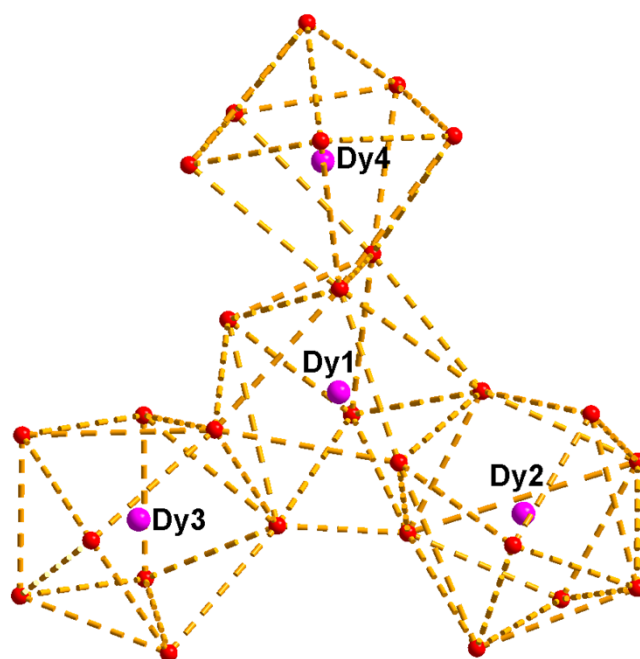

**Fig. S2.** Coordination geometries of the Dy atoms in **2**.

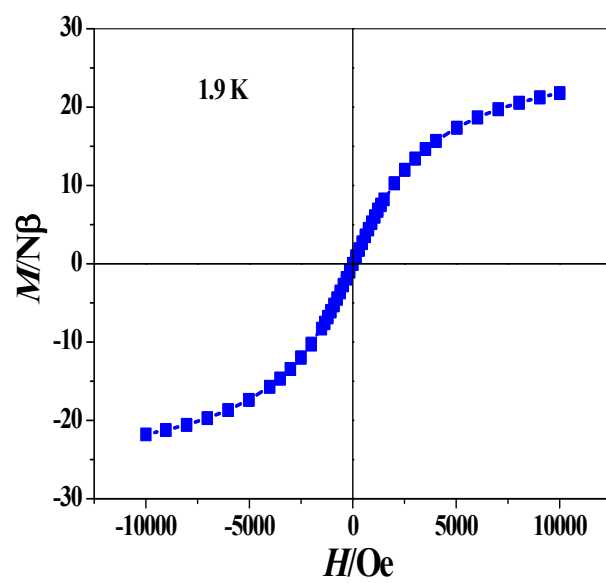

**Fig. S3.** Hysteresis loop of **2** recorded at 1.9 K.
